# Supplementary material
Source: Research Square preprint supplement (doi:10.21203/rs.3.rs-9200426/v1)
Supplement: Supplementary file 1 [file 3780c8fde7ada09a76b4fd12.docx]

**Supplementary File: Identifying Effective Tax Policies to Reduce Cigarette Smoking: Cross Country Empirical Evidence**

**Appendix 1: Description of the Cigarette Tax Scorecard**

The Cigarette Tax Scorecard (CTS) score assignment is shown in Table A1. The CTS utilizes data from the World Health Organization’s biennial **Global Report on the Tobacco Epidemic**, which provides country-level pricing and tax data for the previous calendar year. Specifically, the reports include the local currency price of a 20-pack of the most-sold cigarette brand domestically, which is used as the basis of the **Cigarette Price** scoring component (Table A1).

Additionally, the reports specify the percentage of the price of a 20-pack of the most-sold cigarette brand attributable to excise taxes, import duties, and VAT/other sales taxes. These data inform two key metrics: **excise tax incidence** (the share of excise taxes in the retail price a 20-pack of the most-sold cigarette brand) and **total tax incidence** (the combined share of excise taxes, import duties, and other sales taxes in the retail price of a 20-pack of the most sold cigarette brand). These metrics inform the **Tax Share** scoring component (Table A1).

The WHO's biennial reports also provide a measure of cigarette affordability. This measure, named the Relative Income Price (RIP), is calculated as the ratio of the price of 100 packs of the most-sold cigarette brand to GDP per capita. In practice, the RIP provides an indication of the amount of GDP per capita required to purchase 100 packs of the most-sold cigarette brand. The higher the RIP, the less affordable cigarettes are, and vice versa. The RIP is used to calculate the **Change in Cigarette Affordability** scoring component (Table A1).

Further, the WHO reports provide detailed information on countries' excise tax structures, including whether taxes are specific, *ad valorem*, or mixed, the share of specific excise taxes in the price of the most-sold 20-pack, and whether taxes are uniform or tiered. Additional details cover the application of minimum specific taxes, automatic inflation adjustments, and whether the retail price is used as the base in ad valorem or mixed systems. This information informs the **Tax Structure** scoring component (Table A1).

**Table A1.1 Assignment of scores in the Cigarette Tax Scorecard**

| **Scoring component** | **Score assignment** |
| --- | --- |
| Cigarette Price | The price of a 20-cigarette pack of the most-sold brand in constant international dollars (2018 PPP) is used for scoring. A score of five is the highest, and zero is the lowest. Scores are assigned as follows:  5: Price ≥ 10.0 Intl$ PPP  4: 8.0 ≤ price < 10.0  3: 6.0 ≤ price < 8.0  2: 4.0 ≤ price < 6.0  1: 2.0 ≤ price < 4.0  0: Price < 2.0 Intl$ PPP |
| Change in cigarette affordability | Based on the six-year trend of cigarette affordability (percentage of per capita GDP needed to buy a 20-pack of the most sold cigarette brand domestically). Higher scores are given to countries experiencing decreased affordability due to an excise tax increase. Scores are allocated as follows:  5: 7.5% average annual reduction or higher  4: 5.0% ≤ average annual reduction < 7.5%  3: 2.5% ≤ average annual reduction < 5.0%  2: Average annual reduction < 2.5%  1: Reduced affordability, but no tax increase 0: Increased affordability or no significant reduction |
| **Tax share** | The CTS uses the average score on the total tax share and the excise tax share. These shares are based on the price of the most-sold cigarette brand domestically. The scoring rubric for the total tax incidence is as follows:  **Scoring – Total Tax Share:**  5: 75% or higher  4: 65% ≤ share < 75%  3: 55% ≤ share < 65%  2: 45% ≤ share < 55%  1: 35% ≤ share < 45%  0: Share < 35%  **Scoring – Excise Tax Share:**  5: 70% or higher  4: 60% ≤ share < 70%  3: 50% ≤ share < 60%  2: 40% ≤ share < 50%  1: 30% ≤ share < 40%  0: Share < 30% |
| **Excise tax structure** | 5: A uniform specific tax with automatic adjustment or a mixed system with greater share of specific tax, with an automatic adjustment for the specific component, the retail price as the base for the ad valorem component, and a minimum tax to lift the prices of economy brands  4: Uniform specific or mixed with greater share of specific with some other features but not all  3: Uniform mixed system with greater share of ad valorem  2: Uniform ad valorem  1: Tiered tax  0: No excise |

**Appendix 2: Expanded descriptive statistics**

***Figures***

Figure A2.1 presents a summary of the average CTS score and each of its components in 2014 (the first available year) and 2024 (the last available year), for the 99 countries covered in the analysis, that is, those for which sales data are available.

Figures A2.2 and A2.3 present trends in cigarette sales and real prices (top panels) and between cigarette sales and price scores (bottom panels), from 2008 to 2024, separately for HICs (Figure A2.2) and LMICs (Figure A2.3).

Figure A2.4 compares trends in the overall CTS scores and price sub-score globally (using all countries included in the original CTS database provided by Economics For Health) and in the sample of 99 countries used in this study.

***Tables***

Table A3.1 replicates the results presented in Table 3 and reports additional estimates using lagged CTS scores and sub-scores. It presents the impacts of tax system scores on per-capita cigarettes sales, by income group (LMIC vs HIC), using contemporaneous and lagged scores.

Table A3.2 presents the impact of cigarette affordability on per-capita cigarette sales, including interactions between affordability (and GDP per capita) and overall CTS index. Its structure is the same as that of Table 4.

Table A3.3 presents the impact of cigarette prices on per-capita cigarette sales, including interactions between prices (and GDP per capita) and the tax share component of the CTS index. Its structure is the same as that of Table 4.

Table A3.4 summarizes the results reported in Tables 4, 5, A2.3, A2.4, and includes additional estimates disaggregated by income group. Using Stata command *lincom,* it reports the price elasticity and affordability elasticity of cigarette demand (PED and AED), overall and by income group. The table focuses on the preferred specification, the two-stages least square (2SLS) model, which uses specific taxes as instruments for prices and affordability.

**Figure A2.1: Tax system scores and sub-scores in the analysis sample (99 countries)**

**Figure A2.2: Trend in cigarette sales and real prices or price scores, 2008 to 2024 (HICs)**

**Cigarette sales and real prices**

**Cigarette sales and price scores**

Note: HIC = High income countries as defined by the World Bank Group. Volumes in billion sticks (left axis). Inflation adjusted prices are converted by the WHO using PPP adjusted prices from the “Report on the Global Tobacco Epidemic” for years 2008, 2010, 2012, 2014, 2016, 2018, 2020, 2022 and 2024 along with inflation data (precent change in average consumer prices in the USA) from the IMF World Economic Outlook database, April 2025 (https://www.imf.org/en/Publications/WEO/weo-database/2025/April) with additional adjustments (base year = 2022). The analysis sample includes 100 countries.

**Figure A2.3: Trend in cigarette sales and real prices or price scores, 2008 to 20224(LMICs)**

**Cigarette sales and real prices**

**Cigarette sales and price scores**

Note: LMIC = Low-and-middle-income countries, as defined by the World Bank Group.

See notes for Figure A2.2

**Figure A2.4: Comparison in price sub-scores, global vs. countries in sample**

Note: Simple average of the CTS price sub-scores between samples. The global sample is based on all countries included in the CTS. Countries in sample include 99 countries with available sales.

**Table A3.1: Impacts of tax system scores on per-capita cigarettes sales, by income group (LMIC vs HIC), contemporary and lagged**

|  | Current | | | | | First lag (2 years) | | | | |
| --- | --- | --- | --- | --- | --- | --- | --- | --- | --- | --- |
| VARIABLES | (1) | (2) | (3) | (4) | (5) | (6) | (7) | (8) | (9) | (10) |
| Score_overall X LMIC | -0.070*** |  |  |  |  | -0.090*** |  |  |  |  |
| (-0.119 - -0.021) |  |  |  |  | (-0.152 - -0.029) |  |  |  |  |
| Score_overall X HIC | -0.047** |  |  |  |  | -0.024 |  |  |  |  |
| (-0.084 - -0.010) |  |  |  |  | (-0.055 - 0.007) |  |  |  |  |
| Score_price X LMIC |  | -0.078*** |  |  |  |  | -0.091*** |  |  |  |
|  | (-0.134 - -0.021) |  |  |  |  | (-0.143 - -0.039) |  |  |  |
| Score_price X HIC |  | -0.052*** |  |  |  |  | -0.043*** |  |  |  |
|  | (-0.084 - -0.020) |  |  |  |  | (-0.075 - -0.011) |  |  |  |
| Score_tax share X LMIC |  |  | -0.017 |  |  |  |  | -0.005 |  |  |
|  |  | (-0.091 - 0.058) |  |  |  |  | (-0.080 - 0.070) |  |  |
| Score_tax share X HIC |  |  | -0.035* |  |  |  |  | -0.023 |  |  |
|  |  | (-0.074 - 0.004) |  |  |  |  | (-0.065 - 0.019) |  |  |
| Score_affordability X LMIC |  |  |  | -0.013* |  |  |  |  | -0.020*** |  |
|  |  |  | (-0.028 - 0.002) |  |  |  |  | (-0.035 - -0.005) |  |
| Score_affordability X HIC |  |  |  | -0.009 |  |  |  |  | -0.003 |  |
|  |  |  | (-0.029 - 0.011) |  |  |  |  | (-0.021 - 0.014) |  |
| Score_tax structure X LMIC |  |  |  |  | -0.033 |  |  |  |  | -0.024 |
|  |  |  |  | (-0.076 - 0.010) |  |  |  |  | (-0.063 - 0.016) |
| Score_tax structure X HIC |  |  |  |  | -0.046** |  |  |  |  | -0.010 |
|  |  |  |  | (-0.093 - -0.000) |  |  |  |  | (-0.057 - 0.036) |
| Ln (GDP per capita) X LMIC | 0.629*** | 0.638*** | 0.608** | 0.632*** | 0.620*** | 0.790*** | 0.806*** | 0.734** | 0.735*** | 0.774*** |
| (0.186 - 1.073) | (0.208 - 1.067) | (0.146 - 1.069) | (0.166 - 1.099) | (0.177 - 1.063) | (0.284 - 1.296) | (0.300 - 1.312) | (0.170 - 1.297) | (0.189 - 1.280) | (0.239 - 1.309) |
| Ln (GDP per capita) | 0.380 | 0.393 | 0.465 | 0.465 | 0.463 | 0.345 | 0.387 | 0.469 | 0.434 | 0.479 |
| (-0.229 - 0.990) | (-0.178 - 0.963) | (-0.161 - 1.091) | (-0.163 - 1.092) | (-0.158 - 1.084) | (-0.260 - 0.950) | (-0.204 - 0.978) | (-0.157 - 1.095) | (-0.183 - 1.051) | (-0.154 - 1.112) |
| Constant | 1.495 | 1.405 | 1.120 | 0.948 | 1.111 | 0.815 | 0.538 | 0.365 | 0.500 | 0.126 |
| (-2.838 - 5.828) | (-2.697 - 5.507) | (-3.354 - 5.595) | (-3.431 - 5.328) | (-3.308 - 5.529) | (-3.828 - 5.459) | (-3.976 - 5.051) | (-4.608 - 5.338) | (-4.307 - 5.307) | (-4.788 - 5.041) |
| Observations | 583 | 583 | 583 | 583 | 583 | 477 | 479 | 485 | 486 | 483 |
| R-squared | 0.496 | 0.504 | 0.481 | 0.482 | 0.486 | 0.473 | 0.485 | 0.456 | 0.466 | 0.456 |
| Number of id | 99 | 99 | 99 | 99 | 99 | 99 | 99 | 99 | 99 | 99 |

Notes: *** p < 0.01, ** p < 0.05, * p < 0.1. All models are estimated with standard errors clustered at the country level. 95% confidence intervals are presented in parenthesis. All regressions include country and year fixed effects (not reported).

**Table A3.2 Impact of cigarette affordability on per-capita cigarette sales--moderated by overall tax system score.**

|  | POLS | | | | 2SLS | |
| --- | --- | --- | --- | --- | --- | --- |
| VARIABLES | (1) | (2) | (3) | (4) | (5) | (6) |
|  | All countries | | Countries with specific excise | | All countries | |
| Ln (affordability) | -0.208*** | -0.130*** | -0.326*** | -0.188*** | -0.634*** | -0.480*** |
|  | (-0.317 - -0.099) | (-0.227 - -0.034) | (-0.474 - -0.178) | (-0.305 - -0.070) | (-0.977 - -0.290) | (-0.832 - -0.129) |
| Ln (affordability) X tax score index |  | -0.512*** |  | -0.474*** |  | -0.458 |
|  |  | (-0.815 - -0.208) |  | (-0.785 - -0.163) |  | (-1.013 - 0.097) |
| Ln (GDP per capita) | 0.381* | 0.263 | 0.451* | 0.287 | 0.125 | -0.013 |
|  | (-0.019 - 0.780) | (-0.132 - 0.658) | (-0.073 - 0.976) | (-0.222 - 0.795) | (-0.328 - 0.578) | (-0.505 - 0.478) |
| Constant | 1.826 | 2.512 | 0.805 | 2.053 | 2.960 | 4.026** |
|  | (-2.033 - 5.684) | (-1.220 - 6.244) | (-4.341 - 5.951) | (-2.802 - 6.909) | (-0.649 - 6.568) | (0.156 - 7.895) |
| Observations | 586 | 586 | 466 | 466 | 466 | 466 |
| R-squared | 0.510 | 0.542 | 0.553 | 0.579 |  |  |
| Number of id | 99 | 99 | 83 | 83 | 83 | 83 |

Notes: *** p < 0.01, ** p < 0.05, * p < 0.1. All models are estimated with standard errors clustered at the country level. 95% confidence intervals are presented in parenthesis. All regressions include country and year fixed effects (not reported).

TWFE = Two-way fixed effects.
2SLS = Two-stage least squares using the specific excise tax as instrument for affordability variables.

Specifications in columns (3)-(6) are limited to countries with excise tax systems that includes a specific excise (mixed or not). The “tax share index” is defined as a dummy equal to one if a country has an CTS tax share sub-score above the cross-country mean in all years. Affordability is an index that measures the relative income price of cigarettes, defined by the WHO as the share of income per capita that is needed to purchase 100 packs of cigarettes, obtained from the World Health Organization’s [*Global Health Observatory*](https://www.who.int/data/gho/data/indicators/indicator-details/GHO/tobacco-raise-taxes--affordability). GDP per capita is obtained from the World Bank *World Development Indicators* database (Base year = 2021).

**Table A3.3: Impact of cigarette prices on per-capita cigarette sales--moderated by tax share score**

|  | POLS | | | | 2SLS | |
| --- | --- | --- | --- | --- | --- | --- |
| VARIABLES | (1) | (2) | (3) | (4) | (5) | (6) |
|  | All countries | | Countries with specific excise | | All countries | |
| Ln (real price) | -0.219*** | -0.176*** | -0.322*** | -0.267*** | -0.563*** | -0.514*** |
|  | (-0.327 - -0.112) | (-0.284 - -0.068) | (-0.468 - -0.176) | (-0.421 - -0.113) | (-0.864 - -0.263) | (-0.813 - -0.216) |
| Ln (real price) X tax share index |  | -0.281** |  | -0.195 |  | -0.182 |
|  |  | (-0.538 - -0.024) |  | (-0.487 - 0.097) |  | (-0.536 - 0.171) |
| Ln (GDP per capita) | 0.591*** | 0.543*** | 0.749*** | 0.696*** | 0.713*** | 0.663*** |
|  | (0.224 - 0.959) | (0.198 - 0.887) | (0.235 - 1.263) | (0.196 - 1.196) | (0.445 - 0.981) | (0.376 - 0.950) |
| Constant | 0.887 | 1.568 | -0.387 | 0.271 | 0.428 | 1.053 |
|  | (-2.778 - 4.553) | (-1.886 - 5.021) | (-5.532 - 4.758) | (-4.772 - 5.313) | (-2.406 - 3.262) | (-2.088 - 4.193) |
| Observations | 586 | 586 | 466 | 466 | 466 | 466 |
| R-squared | 0.513 | 0.526 | 0.553 | 0.558 | 0.526 | 0.531 |
| Number of id | 99 | 99 | 83 | 83 | 83 | 83 |

Notes: *** p < 0.01, ** p < 0.05, * p < 0.1. All models are estimated with standard errors clustered at the country level. 95% confidence intervals are presented in parenthesis. All regressions include country and year fixed effects (not reported).

TWFE = Two-way fixed effects.
2SLS = Two-stage least squares using the specific excise tax as instrument for price variables.

Specifications in columns (3)-(6) are limited to countries with excise tax systems that includes a specific excise (mixed or not). The “tax share index” is defined as a dummy equal to one if a country has an CTS tax share sub-score above the cross-country mean in all years. Prices are converted in international PPP dollars, obtained from the World Health Organization’s [Global Health Observatory](https://www.who.int/data/gho/data/indicators/indicator-details/GHO/tobacco-raise-taxes--inflation-adjusted-prices-for-most-sold-brand-of-cigarettes). GDP per capita is obtained from the World Bank *World Development Indicators* database (Base year = 2021).

**Table A3.4: Summary of impact of cigarette prices on per-capita cigarette sales--moderated by overall CTS index, all countries and by income group**

**Panel A- Models with interactions between price and overall CTS index (High / Low = Above/ Below median in all years)**

|  | From Table 4 | From Table 5 | | Difference HIC vs. LMIC | |
| --- | --- | --- | --- | --- | --- |
| PED, by CTS index | All | LMIC | HIC | Difference [SE], p-value | Significant (Y/N) |
| Low CTS (below median) | -0.494*** | -0.540*** | -0.423* | -0.565 [0.446], p>0.1 | **No** |
| (-0.783 - -0.205) | (-0.878 - -0.203) | (-0.853 - 0.007) |
| High CTS (above median) | -0.817*** | -1.312*** | -0.753*** | 0.117 [0.239], p>0.1 | **No** |
| (-1.27 -.364) | (-2.25 -.392) | (-1.21 -.295) |
| Full PED | -.655*** | -0.654*** | -.702*** | 0.048 [0.194], p>0.1 | **No** |
| (-.987 -.323) | (-1.02 -.288) | (-1.11 -.290) |
| Difference High vs Low  CTS overall index (SE), p-value | -0.323 [0.188], p<0.10 | -0.778* [0.429], p<0.10 | -0.33 [0.27], p<0.10 |
| Significant (Y/N) | **Yes, 10%** | **Yes, 10% level** | **No** |

**Panel B- Models with interactions between affordability and overall CTS index (High / Low = Above/ Below median in all years)**

|  | From Table A3.2 |  | | Difference HIC vs. LMIC | |
| --- | --- | --- | --- | --- | --- |
| AED, by CTS index | All | LMIC | HIC | Difference [SE], p-value | Significant (Y/N) |
| Low CTS (below median) | -0.480*** | -0.549*** | -0.443 | -0.106 [0.35], p>0.1 | **No** |
| (-0.832 - -0.129) | (-0.967 - -0.131) | (-1.060 - 0.174) |
| High CTS (above median) | -0.938*** | -1.754** | -0.838*** | -0.915 [0.709], p>0.1 | **No** |
| (-1.477 -.399) | (-3.201 -.306) | (-1.378 -.299) |
| Full AED | -0.708*** | -0.726*** | -0.778*** | 0.052 [0.232], p>0.1 | **No** |
| (-1.07 -.348) | (-1.16 -.295) | (-1.252 -.303) |
| Difference High vs Low  CTS overall index (SE), p-value | -0.458 [0.283], p>0.1 | -1.2 [0.75], p>0.1 | -0.295 [0.399], p>0.1 |
| Significant (Y/N) | **No** | **No** | **No** |

**Panel C- Models with interactions between price and CTS tax share index (High / Low = Above/ Below median in all years)**

|  | From Table A3.3 |  | | Difference HIC vs. LMIC | |
| --- | --- | --- | --- | --- | --- |
| PED, by CTS index | All | LMIC | HIC | Difference [SE], p-value | Significant (Y/N) |
| Low CTS (below median) | -0.514*** | -0.527*** | -0.908*** | 0.381 [0.271], p>0.1 | **No** |
| (-0.813 - -0.216) | (-0.873 - -0.182) | (-1.413 - -0.404) |
| High CTS (above median) | -0.697*** | -0.926*** | -0.649*** | -0.277 [0.315], p>0.1 | **No** |
| (-1.124 -.269) | (-1.57 -.280) | (-1.10 -.202) |
| Full PED | -0.618*** | -0.644*** | -0.690*** | 0.045 [0.194], p>0.1 | **No** |
| (-.953 -.283) | (-1.01 -.276) | (-1.10 -.280) |
| Difference High vs Low  CTS tax share index (SE), p-value | -0.182 [0.18], p>0.1 | 0.399 [0.299], p>0.1 | 0.259 [0.289], p>0.1 |
| Significant (Y/N) | **No** | **No** | **No** |

Notes: *** p < 0.01, ** p < 0.05, * p < 0.1. PED=Price elasticity of demand; AED=Affordability elasticity of demand.

All models are estimated with standard errors clustered at the country level. 95% confidence intervals are presented in parenthesis (for coefficients) and standard errors (SE) are presented in brackets (for t-tests of differences between coefficients). For t-tests t, standard errors of linear combinations are calculated using the delta method and the variance–covariance matrix. Coefficients of PED in Panel A are derived from 2SLS models presented in Table 4 (column 6) for models without country income groups interactions, and Table 5 (column 6) for models disaggregated by country income groups. Likewise, coefficients of AED in Panel B and PED in panel C are derived from 2SLS models presented in columns 6 of Tables A3.2 and A3.3, respectively. We do not report results for Tables A3.2 and A3.3 disaggregated by country income groups because the interactions with CTS indices are not significant. Nevertheless, results are available upon request. Instead, Table A3.4 presents the summary of the relevant elasticities, overall and by income groups.
